# Supplementary material for: Molecular characterization of immune responses of Helicoverpa armigera to infection with the mermithid nematode Ovomermis sinensis
Source: BMC Genomics. 2019 Feb 27;20:161. doi: 10.1186/s12864-019-5544-1 (PMC6391810; doi:10.1186/s12864-019-5544-1)
Supplement: Supplementary file 6 — Table S4. List of primers used. (XLS 21 kb) [file 12864_2019_5544_MOESM6_ESM.xls]

## Sheet: Sheet1
Table S4. List of Primers Used
Target gene	Direction	Primer Sequence (5¢-3¢)
CTL4	Forward	AGCAACCAGCCAGACGGAG
	Reverse	AAGCTGCGAAGACAGCGTG
CTL7	Forward	CTCTGCAAGCCGCAGTACT
	Reverse	GTGGAGACGCTAACACTGC
gloverin	Forward	TACAAGGCCAGGCATATGGC
	Reverse	CCTCCAATCTGCTTGTGCAC
cecropin 3	Forward	GAGCCCAGGTGGAAGGTCT
	Reverse	CCAATAGCTTTAGCCTGGCC
SP4	Forward	ACTGGTGCCTTCAACGTTGG
	Reverse	GTAGCCGCAGAAGAGAGCAG
azurocidin-like SP	Forward	GTGGCTCAATTGACGAGAGG
	Reverse	ATAGACGGTGTTCAGACGCG
mucin protein	Forward	AAGCTGCAATGGCTCTTGCC
	Reverse	TCGTTGTCTCCGTCATTGCC
mucin 4	Forward	AAACTTGGCAGTGCGACTGG
	Reverse	GCTCGAGAGTAGTGGGCTC
b-actin	Forward	CCTGGTATTGCTGACCGTATGC
	Reverse	CTGTTGGAAGGTGGAGAGGGAA
16S rRNA	Forward	ACTCCTACGGGAGGCAGCAG
	Reverse	GGACTACHVGGGTWTCTAAT
